# Supplementary material
Source: PubMed Central journal article supplement (PMC8990200)
Supplement: bmjstel-2016-000124.supp1.pdf [file bmjstel-2016-000124.supp1.pdf]

## Supplemental Digital Content 1

### Survey Responses: Items on the CONSORT and STROBE Statements Requiring an Extension for Simulation-based Research

| Checklist Item              | CONSORT Description <sup>1</sup>                                                                                                                                                                   | STROBE Description <sup>2</sup>                                                                                                                                                                 | Respondents, n (%) indicating extension required* |
|-----------------------------|----------------------------------------------------------------------------------------------------------------------------------------------------------------------------------------------------|-------------------------------------------------------------------------------------------------------------------------------------------------------------------------------------------------|---------------------------------------------------|
| <b>Title and abstract</b>   | 1a: Identification as a randomized trial in the title<br>1b: Structured summary of trial design, methods, results, and conclusions                                                                 | 1a: Indicate the study's design with a commonly used term in the title or the abstract.<br>1b: Provide in the abstract an informative and balanced summary of what was done and what was found. | 17/57 (30%)                                       |
| <b>Introduction</b>         |                                                                                                                                                                                                    |                                                                                                                                                                                                 |                                                   |
| Background/rationale        | 2a: Scientific background and explanation of rationale<br>2b: Specific objectives or hypotheses                                                                                                    | 2: Explain the scientific background and rationale for the investigation being reported.                                                                                                        | 15/53 (28%)                                       |
| Objectives                  | N/A                                                                                                                                                                                                | 3: State specific objectives, including any pre-specified hypotheses.                                                                                                                           | 11/52 (21%)                                       |
| <b>Methods</b>              |                                                                                                                                                                                                    |                                                                                                                                                                                                 |                                                   |
| Trial Design / Study Design | 3a: Description of trial design (such as parallel, factorial) including allocation ratio<br>3b: Important changes to methods after trial commencement (such as eligibility criteria), with reasons | 4: Present key elements of study design early in the paper.                                                                                                                                     | 18/52 (35%)                                       |
| Setting                     | N/A                                                                                                                                                                                                | 5: Describe the setting, locations, and relevant dates, including periods of recruitment, exposure, follow-up, and data collection.                                                             | 24/51 (47%)                                       |

| Checklist Item             | CONSORT Description                                                                                                                          | STROBE Description <sup>2</sup>                                                                                                                                                                                                                                                                                                                                                                                                                                                                                                                                                                                                                                    | Respondents, n (%) indicating extension required* |
|----------------------------|----------------------------------------------------------------------------------------------------------------------------------------------|--------------------------------------------------------------------------------------------------------------------------------------------------------------------------------------------------------------------------------------------------------------------------------------------------------------------------------------------------------------------------------------------------------------------------------------------------------------------------------------------------------------------------------------------------------------------------------------------------------------------------------------------------------------------|---------------------------------------------------|
| Participants               | 4a: Eligibility criteria for participants<br>4b: Settings and locations where the data were collected                                        | 6a: Cohort study: Give the eligibility criteria, and the sources and methods of selection of participants. Describe methods of follow-up.<br>Case-control study: Give the eligibility criteria, and the sources and methods of case ascertainment and control selection. Give the rationale for the choice of cases and controls.<br>Cross-sectional study: Give the eligibility criteria, and the sources and methods of selection of participants.<br>6b: Cohort study: For matched studies, give matching criteria and number of exposed and unexposed.<br>Case-control study: For matched studies, give matching criteria and the number of controls per case. | 17/51 (33%)                                       |
| Interventions              | 5: The interventions for each group with sufficient details to allow for replication, including how and when they were actually administered | N/A                                                                                                                                                                                                                                                                                                                                                                                                                                                                                                                                                                                                                                                                | 27/46 (59%)                                       |
| Variables                  | N/A                                                                                                                                          | 7: Clearly define all outcomes, exposures, predictors, potential confounders, and effect modifiers. Give diagnostic criteria, if applicable.                                                                                                                                                                                                                                                                                                                                                                                                                                                                                                                       | 16/47 (34%)                                       |
| Data sources / measurement | N/A                                                                                                                                          | 8: For each variable of interest, give sources of data and details of methods of assessment (measurement). Describe comparability of assessment methods if there is more than one group                                                                                                                                                                                                                                                                                                                                                                                                                                                                            | 23/48 (48%)                                       |

| Checklist Item                                  | CONSORT Description                                                                                                                                                                                 | STROBE Description <sup>2</sup>                              | Respondents, n (%) indicating extension required* |
|-------------------------------------------------|-----------------------------------------------------------------------------------------------------------------------------------------------------------------------------------------------------|--------------------------------------------------------------|---------------------------------------------------|
| Outcomes                                        | 6a: Completely defined pre-specified primary and secondary outcome measures, including how and when they were assessed<br>6b: Any changes to trial outcomes after the trial commenced, with reasons | N/A                                                          | 7/45 (16%)                                        |
| Bias                                            | N/A                                                                                                                                                                                                 | 9: Describe any efforts to address potential sources of bias | 7/47 (15%)                                        |
| Sample size / Study size                        | 7a: How sample size was determined<br>7b: When applicable, explanation of any interim analyses and stopping guidelines                                                                              | 10: Explain how the study size was arrived at.               | 10/46 (22%)                                       |
| Randomization: Sequence generation              | 8a: Method used to generate the random allocation sequence<br>8b: Type of randomization; details of any restriction (such as blocking and block size)                                               | N/A                                                          | 7/46 (15%)                                        |
| Randomization: Allocation concealment mechanism | 9: Mechanism used to implement the random allocation sequence (such as sequentially numbered containers), describing any steps taken to conceal the sequence until interventions were assigned      | N/A                                                          | 7/47 (15%)                                        |
| Randomization: Implementation                   | 10: Who generated the random allocation sequence, who enrolled participants, and who assigned participants to interventions                                                                         | N/A                                                          | 7/45 (16%)                                        |

| Checklist Item         | CONSORT Description                                                                                                                                                                                                | STROBE Description <sup>2</sup>                                                                                                                                                                                                                                                                                                                                                                                                                                                                                                                    | Respondents, n (%) indicating extension required* |
|------------------------|--------------------------------------------------------------------------------------------------------------------------------------------------------------------------------------------------------------------|----------------------------------------------------------------------------------------------------------------------------------------------------------------------------------------------------------------------------------------------------------------------------------------------------------------------------------------------------------------------------------------------------------------------------------------------------------------------------------------------------------------------------------------------------|---------------------------------------------------|
| Blinding (masking)     | 11a: If done, who was blinded after assignments to interventions (for example, participants, care providers, those assessing outcomes) and how<br>11b: If relevant, description of the similarity of interventions | N/A                                                                                                                                                                                                                                                                                                                                                                                                                                                                                                                                                | 13/47 (28%)                                       |
| Quantitative variables | N/A                                                                                                                                                                                                                | 11: Explain how quantitative variables were handled in the analyses. If applicable, describe which groupings were chosen, and why.                                                                                                                                                                                                                                                                                                                                                                                                                 | 5/47 (11%)                                        |
| Statistical Methods    | 12a: Statistical methods used to compare groups for primary and secondary outcomes<br>12b: Methods for additional analyses, such as subgroup analyses and adjusted analyses                                        | 12a: Describe all statistical methods, including those used to control for confounding.<br>12b: Describe any methods used to examine subgroups and interactions.<br>12c: Explain how missing data were addressed.<br>12d: Cohort study: If applicable, explain how loss to follow-up was addressed. Case-control study: If applicable, explain how matching of cases and controls was addressed. Cross-sectional study: If applicable, describe analytical methods taking account of sampling strategy.<br>12e: Describe any sensitivity analyses. | 7/47 (15%)                                        |

| Checklist Item                   | CONSORT Description                                                                                                                                                                                                                          | STROBE Description <sup>2</sup>                                                                                                                                                                                                                                                                                           | Respondents, n (%) indicating extension required* |
|----------------------------------|----------------------------------------------------------------------------------------------------------------------------------------------------------------------------------------------------------------------------------------------|---------------------------------------------------------------------------------------------------------------------------------------------------------------------------------------------------------------------------------------------------------------------------------------------------------------------------|---------------------------------------------------|
| <b>Results</b>                   |                                                                                                                                                                                                                                              |                                                                                                                                                                                                                                                                                                                           |                                                   |
| Participants / Participant flow  | 13a: For each group, the numbers of participants who were randomly assigned, received intended treatment, and were analysed for the primary outcome<br>13b: For each group, losses and exclusions after randomization, together with reasons | 13a: Report the numbers of individuals at each stage of the study—e.g., numbers potentially eligible, examined for eligibility, confirmed eligible, included in the study, completing follow-up, and analyzed.<br>13b: Give reasons for nonparticipation at each stage.<br>13c: Consider use of a flow diagram.           | 5/46 (11%)                                        |
| Recruitment                      | 14a: Dates defining the periods of recruitment and follow-up<br>14b: Why the trial ended or was stopped                                                                                                                                      | N/A                                                                                                                                                                                                                                                                                                                       | 8/47 (17%)                                        |
| Baseline data / Descriptive data | 15: A table showing baseline demographic and clinical characteristics of each group                                                                                                                                                          | 14a: Give characteristics of study participants (e.g., demographic, clinical, social) and information on exposures and potential confounders.<br>14b: Indicate the number of participants with missing data for each variable of interest.<br>14c: Cohort study: Summarize follow-up time—e.g., average and total amount. | 10/47 (21%)                                       |
| Numbers analyzed                 | 16: For each group, number of participants (denominator) included in each analysis and whether analysis was by original assigned groups                                                                                                      | N/A                                                                                                                                                                                                                                                                                                                       | 5/46 (11%)                                        |

| Checklist Item                         | CONSORT Description                                                                                                                                                                                                                                        | STROBE Description <sup>2</sup>                                                                                                                                                                                                                                                                                                                                                                                        | Respondents, n (%) indicating extension required* |
|----------------------------------------|------------------------------------------------------------------------------------------------------------------------------------------------------------------------------------------------------------------------------------------------------------|------------------------------------------------------------------------------------------------------------------------------------------------------------------------------------------------------------------------------------------------------------------------------------------------------------------------------------------------------------------------------------------------------------------------|---------------------------------------------------|
| Outcomes and estimation / Outcome data | 17a: For each primary and secondary outcome, results for each group, and the estimated effect size and its precision (such as 95% confidence interval)<br>17b: For binary outcomes, presentation of both absolute and relative effect sizes is recommended | 15: Cohort study: Report numbers of outcome events or summary measures over time.<br>Case-control study: Report numbers in each exposure category or summary measures of exposure.<br>Cross-sectional study: Report numbers of outcome events or summary measures.                                                                                                                                                     | 6/46 (13%)                                        |
| Main results                           | N/A                                                                                                                                                                                                                                                        | 16a: Give unadjusted estimates and, if applicable, confounder-adjusted estimates and their precision (e.g., 95% confidence intervals). Make clear which confounders were adjusted for and why they were included.<br>16b: Report category boundaries when continuous variables were categorized.<br>16c: If relevant, consider translating estimates of relative risk into absolute risk for a meaningful time period. | 9/45 (20%)                                        |
| Ancillary analyses / Other analyses    | 18: Results of any other analyses performed, including subgroup analyses and adjusted analyses, distinguishing pre-specified from exploratory                                                                                                              | 17: Report other analyses done—e.g., analyses of subgroups and interactions and sensitivity analyses.                                                                                                                                                                                                                                                                                                                  | 4/46 (9%)                                         |
| Adverse Events                         | 19: All important harms or unintended effects in each group (for specific guidance see CONSORT for harms)                                                                                                                                                  | N/A                                                                                                                                                                                                                                                                                                                                                                                                                    | 3/46 (7%)                                         |
| <b>Discussion</b>                      |                                                                                                                                                                                                                                                            |                                                                                                                                                                                                                                                                                                                                                                                                                        |                                                   |
| Key results                            | N/A                                                                                                                                                                                                                                                        | 18: Summarize key results with reference to study objectives.                                                                                                                                                                                                                                                                                                                                                          | 3/46 (7%)                                         |

| Checklist Item           | CONSORT Description                                                                                                  | STROBE Description <sup>2</sup>                                                                                                                                                 | Respondents, n (%) indicating extension required* |
|--------------------------|----------------------------------------------------------------------------------------------------------------------|---------------------------------------------------------------------------------------------------------------------------------------------------------------------------------|---------------------------------------------------|
| Limitations              | 20: Trial limitations, addressing sources of potential bias, imprecision, and, if relevant, multiplicity of analyses | 19: Discuss limitations of the study, taking into account sources of potential bias or imprecision. Discuss both direction and magnitude of any potential bias.                 | 7/46 (15%)                                        |
| Generalizability         | 21: Generalizability (external validity) of the trial findings                                                       | 21: Discuss the generalizability (external validity) of the study results.                                                                                                      | 4/46 (9%)                                         |
| Interpretation           | 22: Interpretation consistent with results, balancing benefits and harms, and considering other relevant evidence    | 20: Give a cautious overall interpretation of results considering objectives, limitations, multiplicity of analyses, results from similar studies, and other relevant evidence. | 4/46 (9%)                                         |
| <b>Other Information</b> |                                                                                                                      |                                                                                                                                                                                 |                                                   |
| Registration             | 23: Registration number and name of trial registry                                                                   | N/A                                                                                                                                                                             | 1/46 (2%)                                         |
| Protocol                 | 24: Where the full trial protocol can be accessed, if available                                                      | N/A                                                                                                                                                                             | 1/46 (2%)                                         |
| Funding                  | 25: Sources of funding and other support (such as supply of drugs), role of funders                                  | 22: Give the source of funding and the role of the funders for the present study and, if applicable, for the original study on which the present article is based.              | 7/46 (15%)                                        |

\*denominator represents number of respondents for the question

## References

1. Moher D, Hopewell S, Schulz KF et al. CONSORT 2010 Explanation and Elaboration: updated guidelines for reporting parallel group randomised trials. *BMJ*. 2010; 340:c869.
2. Vandembroucke JP, von Elm E, Altman DG, Gøtzsche PC, Mulrow CD, Pocock SJ, et al., for the STROBE Initiative. Strengthening the Reporting of Observational Studies in Epidemiology (STROBE): explanation and elaboration. *PLoS Med*. 2007; 4:e297
